# Supplementary material
Source: PubMed Central journal article supplement (PMC3856888)

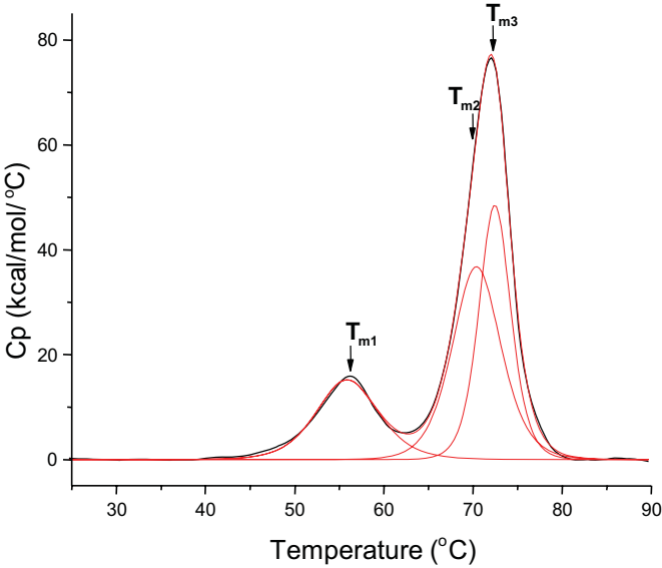

**Shaking  
@ 300 RPM**

**pH 4.0**

**4.0 Hours**

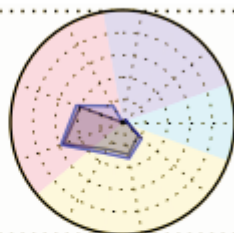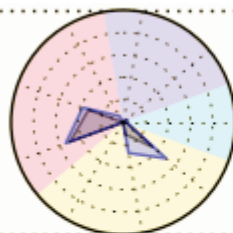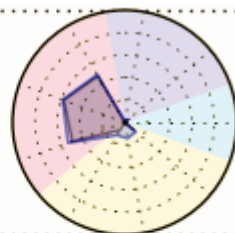

**2.0 Hours**

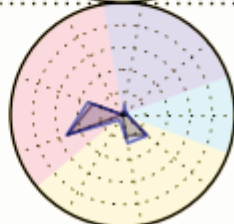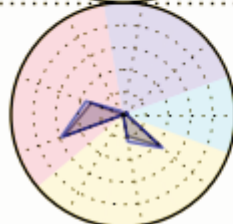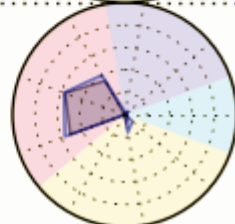

**10.0 Minutes**

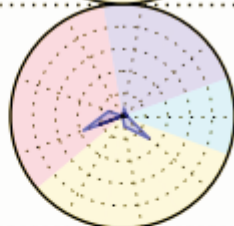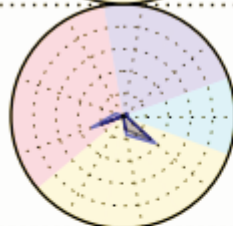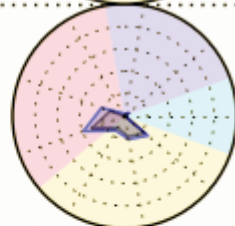

**0.0 Hours**

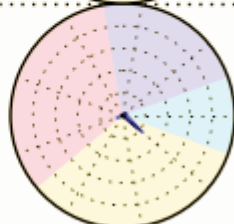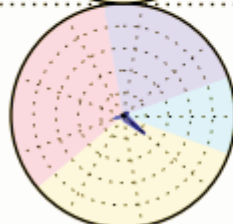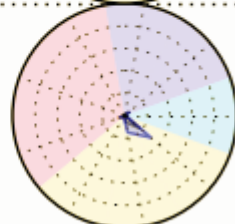

**0 mM NaCl**

**150 mM NaCl**

**1M NaCl**

Stirring@  
Setting 5

pH 4

pH 6

pH 8

4 Hours

2 Hours

10 Min.

0 Hours

0mM NaCl

150mM NaCl

1M NaCl

0mM NaCl

150mM NaCl

1M NaCl

0mM NaCl

150mM NaCl

1M NaCl

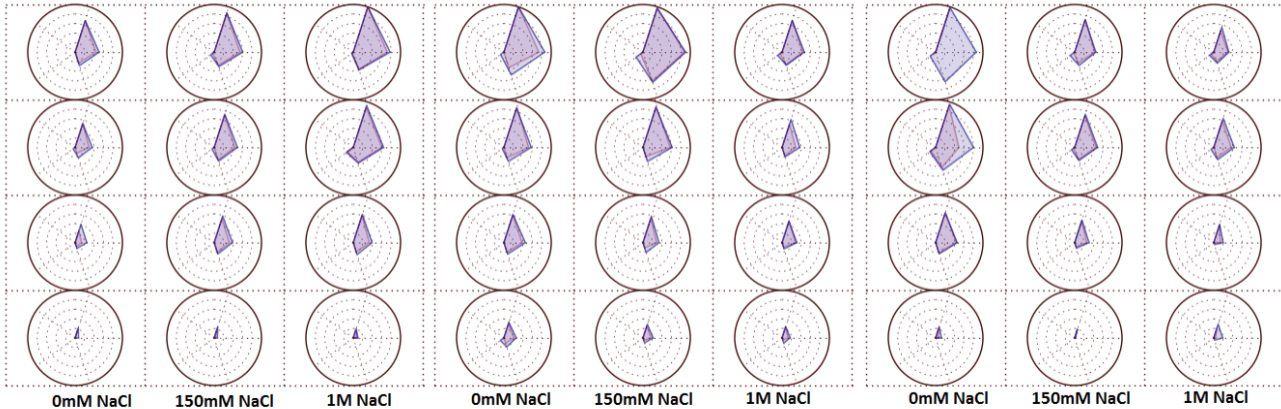

Shaking@300  
RPM

**pH 4**

**pH 6**

**pH 8**

**4 Hours**

**2 Hours**

**10 Min.**

**0 Hours**

**0mM NaCl**

**150mM NaCl**

**1M NaCl**

**0mM NaCl**

**150mM NaCl**

**1M NaCl**

**0mM NaCl**

**150mM NaCl**

**1M NaCl**

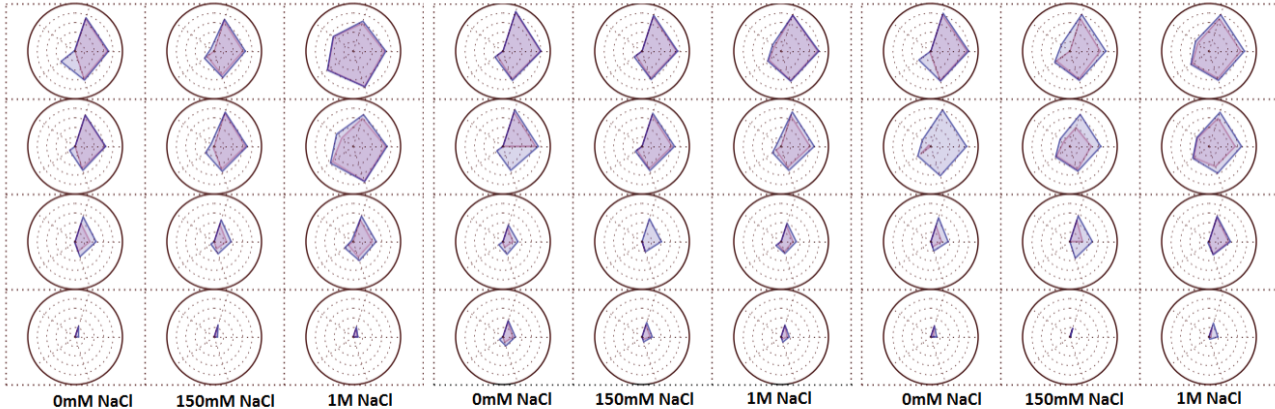

Supplement: NIHMS529115-supplement-Supp_Fig_S1-S4.pdf [file NIHMS529115-supplement-Supp_Fig_S1-S4.pdf]
