# Supplementary material
Source: PubMed Central journal article supplement (PMC3856888)
Supplement: NIHMS529115-supplement-01.pdf [file NIHMS529115-supplement-01.pdf]

**Figure S1. Representative DSC thermogram of the IgG1 mAb.** DSC thermogram of the IgG1 mAb (1 mg/mL) in a 20 mM citrate phosphate buffer, pH 4.0, no NaCl.  $T_{m1}$ ,  $T_{m2}$ , and  $T_m$  are labeled and correspond to the deconvoluted peaks as indicated in figure.

**Figure S2. Multiple instruments radar chart array analysis for accelerated stress study with IgG1 mAb.** IgG1 mAb solutions containing 20 mM citrate phosphate buffer (pH 4.0) and varying NaCl concentrations were stressed by shaking side-to-side at 300 RPM over time (n=3). Samples were evaluated by a combination of SEC, RMM and MFI. The Y-axis represents the amount of time the samples was stressed (in minutes), the X-axis represents NaCl concentration. Refer to Figure 6 for an explanation of units and scales for the individual radar charts for each analytical method (SEC, RMM and MFI data).

**Figure S3. Radar chart array analysis of subvisible particle concentration and size for particles created by stirring.** IgG1 mAb solutions of varying pH values and NaCl concentrations were exposed to stirring with a Teflon bar for up to 4 h (n=3). The Y-axis represents the amount of time the formulations were stressed (in minutes), the X-axis represents NaCl concentrations, and each radar chart panel (left, middle, right) signifies a change in pH. Refer to Figure 1 for an explanation of particle concentration and size scales shown in individual radar charts.

**Figure S4. Radar chart array analysis of subvisible particle concentration and size for particles created by shaking.** IgG1 mAb solutions of varying pH values and NaCl concentrations were exposed to side-to-side shaking at 300RPM for up to 4 h (n=3). The Y-axis

represents the amount of time the formulations were stressed (in minutes), the X-axis represents NaCl concentrations, and each radar chart panel (left, middle, right) signifies a change in pH. Refer to Figure 1 for an explanation of particle concentration and size scales shown in individual radar charts.
